# Supplementary material for: An integrated magnetoimpedance biosensor microfluidic magnetic platform for the evaluation of the cardiac marker cTnI
Source: Royal Society of Chemistry journal article supplement (doi:10.1039/d4ay02021a), 2024-12-18
Supplement: d4ay02021a1.pdf [file d4ay02021a1.pdf]

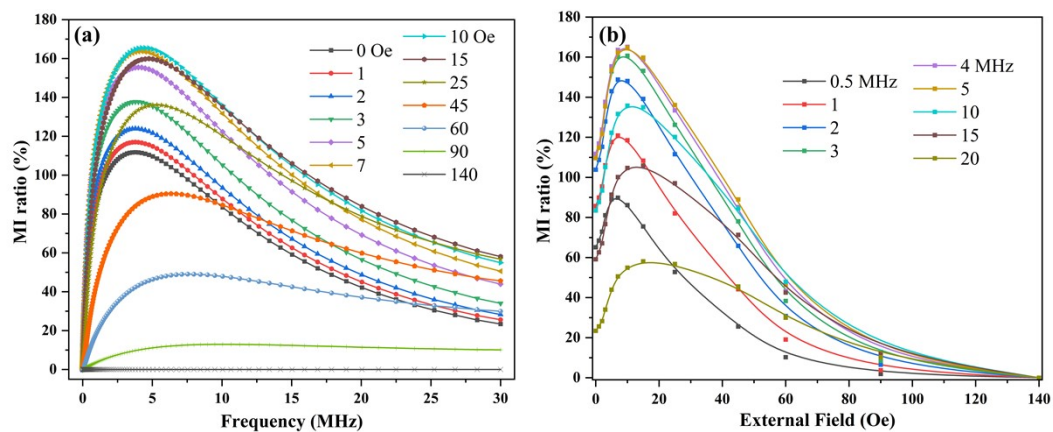

**Fig. S3.** MI responses of the film elements at different frequencies and fields without bias field.

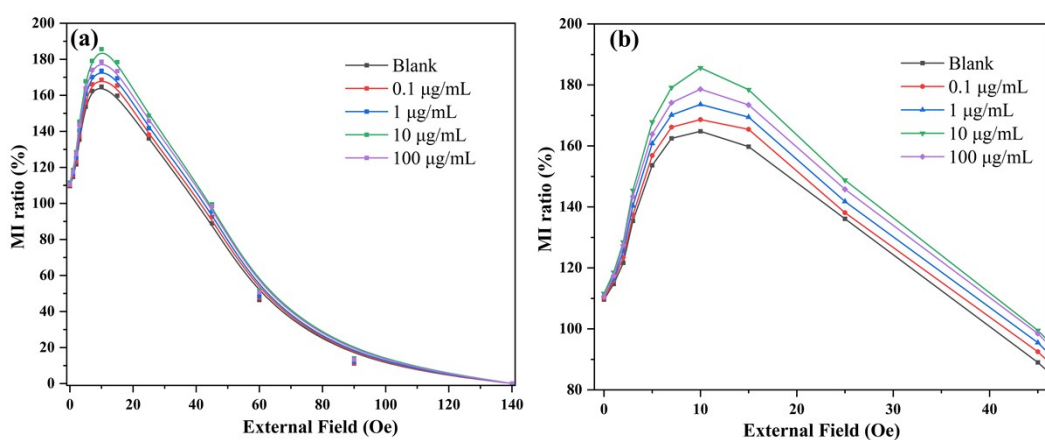

**Fig. S4.** The fields dependence of different Dynabeads concentration (a) full view and (b) partial enlargement..
